# Supplementary material for: In vitro digestion of emulsions: high spatiotemporal resolution using synchrotron SAXS
Source: Royal Society of Chemistry journal article supplement (doi:10.1039/c5sm01205h), 2015-01-01
Supplement: c5sm01205h2.pdf [file c5sm01205h2.pdf]

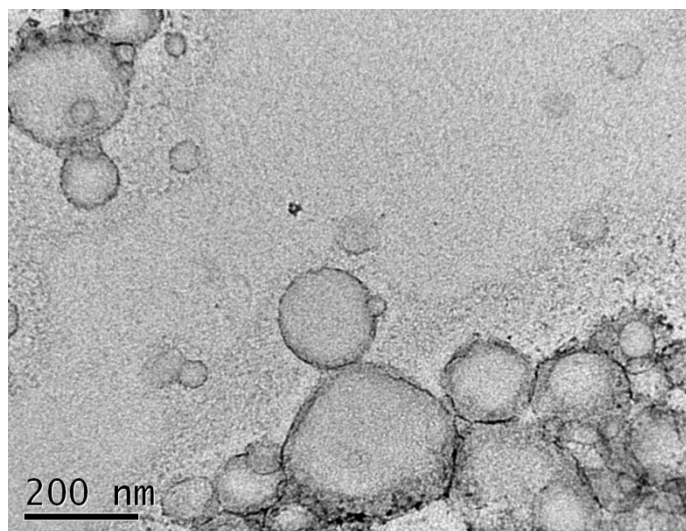

TC-BLG ref

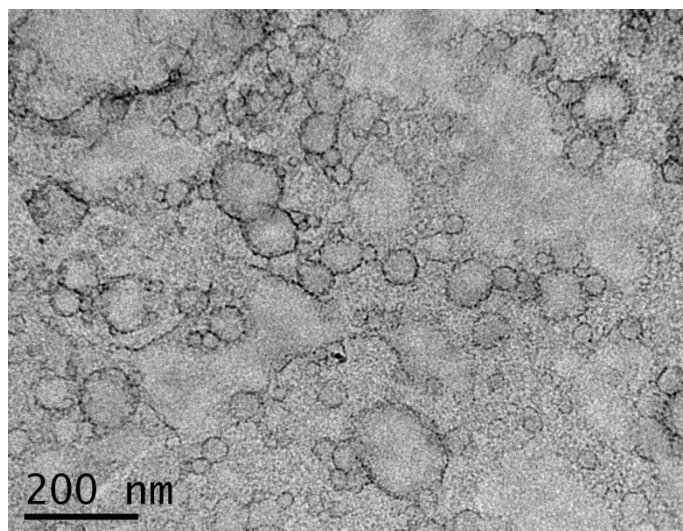

TO-BLG ref

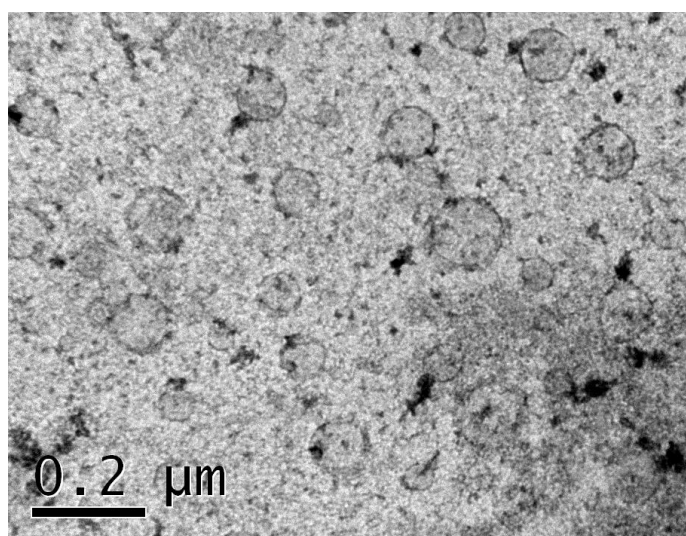

TC-BLG t0

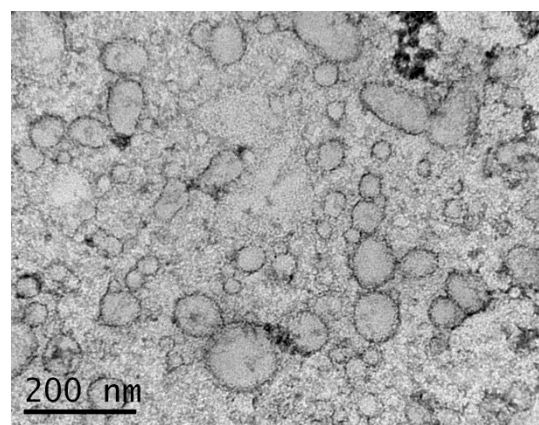

TO-BLG t0

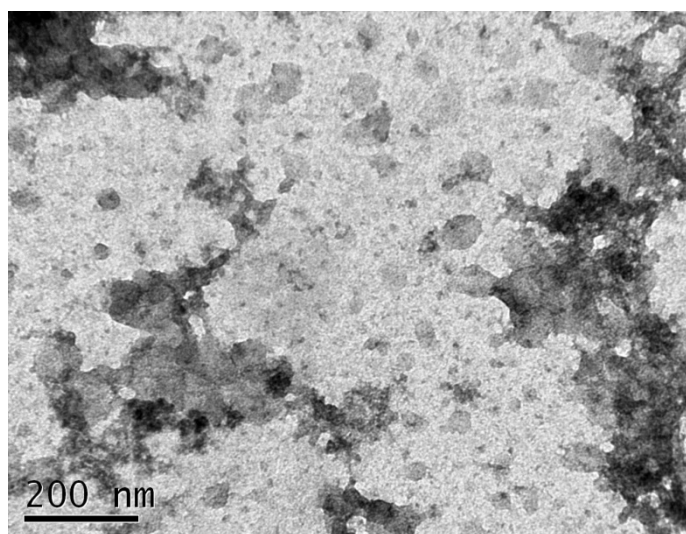

TC-BLG t30

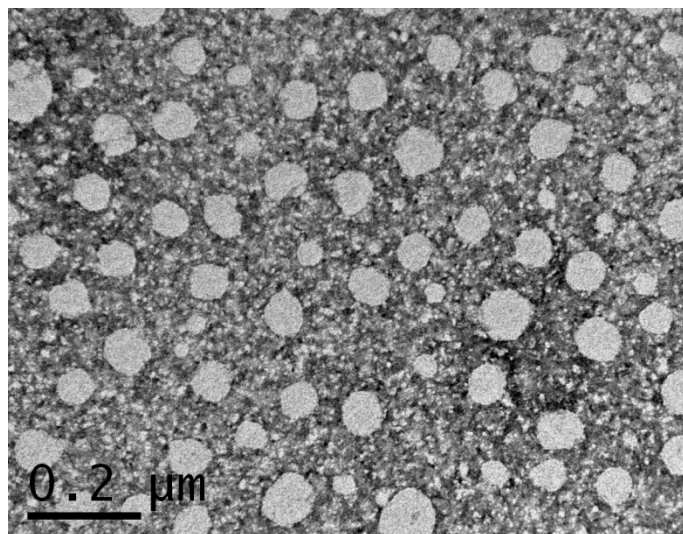

TO-BLG t30

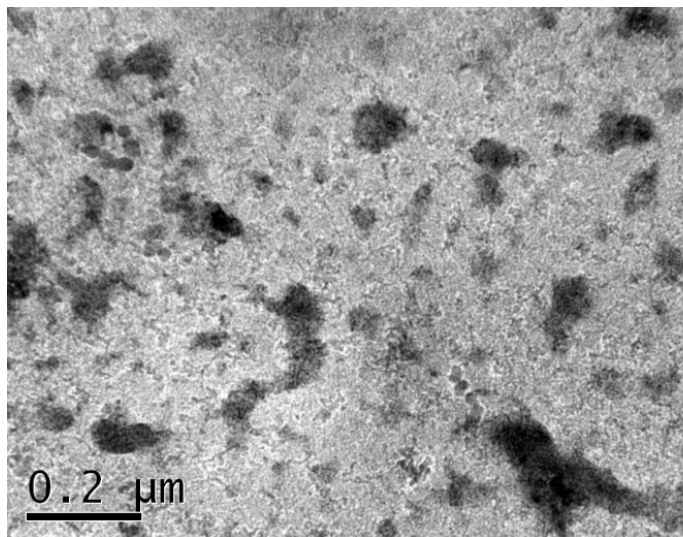

TC-BLG t60

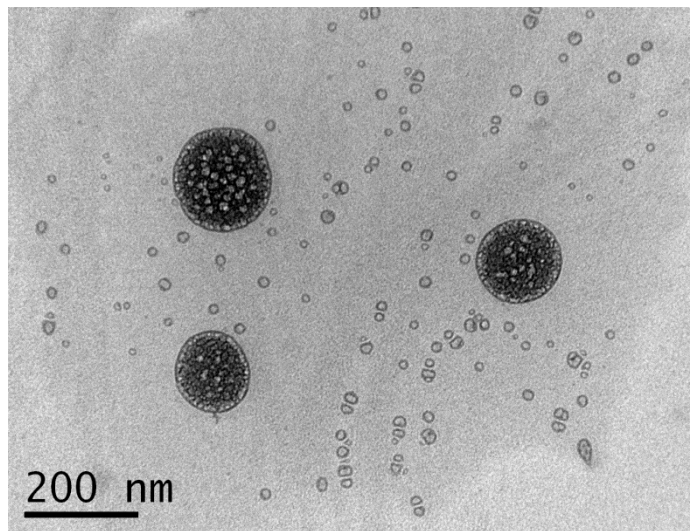

TO-BLG t60

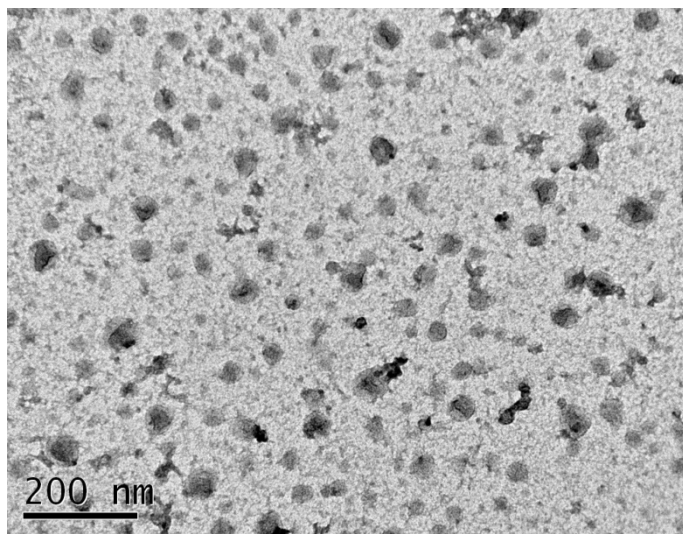

TC-BLG t90

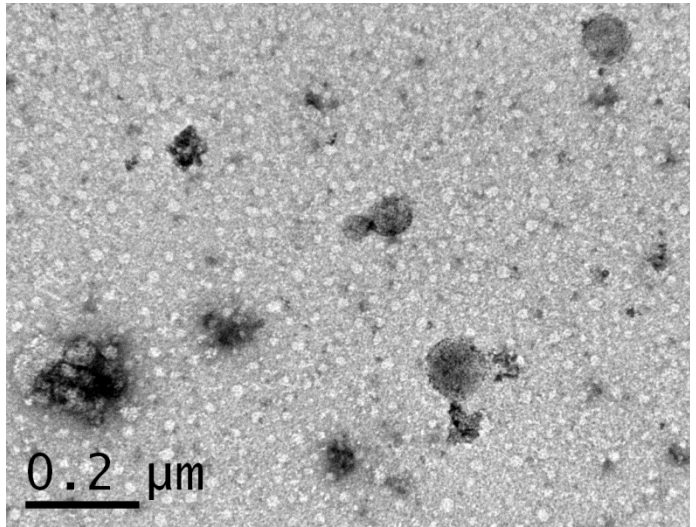

TO- BLG t90

**Supplementary information:** Transmission electron microscopy micrographs of the BLG reference emulsions and at selected times (min) during *in vitro* digestion. All scales were harmonized to enable a direct visual comparison of the objects size.

**Methods:** Transmission electron microscopy (TEM). For each specimen, a droplet of emulsion was placed on a carbon-coated TEM copper grid (Quantifoil, Germany) previously submitted to a glow-discharge to ensure hydrophilicity. The sample was then negatively stained with a 2 % aqueous solution of uranyl acetate (Merck, Germany), and air-dried before electron microscopy investigation. Observations were performed using a JEM-1230 microscope (Jeol, Japan) operated at an acceleration voltage of 120 kV and equipped with a LaB6 filament. All the micrographs were recorded on a 1.35 K x 1.04 K x 12 bit ES500W erlangshen CCD camera (Gatan, USA).
